# Supplementary material for: Analysis of Genome Sequences from Plant Pathogenic Rhodococcus Reveals Genetic Novelties in Virulence Loci
Source: PubMed Central journal article supplement (PMC4092121; doi:10.1371/journal.pone.0101996), 2014-07-10
Supplement: pone.0101996.s007.pdf [file pone.0101996.s007.pdf]

**Supplemental Table S2. Reciprocal best BLAST hit analysis of pFiD188 against the genome assemblies for A25f and A21d2**

| D188 locus IDs*         | Annotated gene function <sup>§</sup>                                           | D188 locus IDs | A25f locus ID | A21d2 locus ID | A25f %ID | A21d2 %ID |
|-------------------------|--------------------------------------------------------------------------------|----------------|---------------|----------------|----------|-----------|
| pFi_010                 | hypothetical protein                                                           | RFD188_04854   |               | RFA21d2_02415  |          | 27.4%     |
| pFi_037                 | putative transposase                                                           | RFD188_04878   |               | RFA21d2_03325  |          | 88.7%     |
| pFi_044                 | hypothetical protein                                                           | RFD188_04885   |               | RFA21d2_02318  |          | 61.3%     |
| pFi_045                 | hypothetical protein                                                           | RFD188_04886   |               | RFA21d2_02317  |          | 56.3%     |
| pFi_055                 | hypothetical protein                                                           | RFD188_04899   | RFA25f_04154  |                | 87.1%    |           |
| pFi_056                 | putative aldo/ketoreductase family protein                                     | RFD188_04900   | RFA25f_04153  |                | 85.2%    |           |
| pFi_057                 | hypothetical protein                                                           | RFD188_04901   | RFA25f_04152  | RFA21d2_03351  | 88.3%    | 37.7%     |
| pFi_058                 | putative integral membrane efflux protein of the major facilitator superfamily | RFD188_04902   | RFA25f_04151  |                | 95.8%    |           |
| pFi_059                 | putative haloacid dehalogenase (HAD) superfamily hydrolase                     | RFD188_04903   | RFA25f_04150  |                | 94.0%    |           |
| pFi_060                 | putative gamma-butyrolactone biosynthesis protein of the AfsA family           | RFD188_04904   | RFA25f_04149  |                | 97.8%    |           |
| pFi_061                 | putative MhpC-like hydrolase or acyltransferase                                | RFD188_04905   | RFA25f_04148  |                | 90.5%    |           |
| pFi_062                 | putative drug exporter of the RND superfamily                                  | RFD188_04906   | RFA25f_04147  |                | 89.1%    |           |
| pFi_063                 | putative TetR family transcriptional regulator                                 | RFD188_04907   | RFA25f_04146  |                | 87.8%    |           |
| pFi_064 ( <i>attR</i> ) | LysR type transcriptional regulator                                            | RFD188_04908   | RFA25f_04137  | RFA21d2_02316  | 94.5%    | 97.7%     |
| pFi_065 ( <i>attX</i> ) | putative efflux protein of the LysE superfamily                                | RFD188_04909   | RFA25f_04136  | RFA21d2_02315  | 96.2%    | 97.1%     |
| pFi_066 ( <i>attA</i> ) | putative argininosuccinate lyase                                               | RFD188_04910   | RFA25f_04135  | RFA21d2_02314  | 98.6%    | 98.8%     |
| pFi_067 ( <i>attB</i> ) | putative argininosuccinate synthase                                            | RFD188_04911   | RFA25f_04134  | RFA21d2_02313  | 99.0%    | 99.0%     |
| pFi_068 ( <i>attC</i> ) | putative folate-dependent phosphoribosylglycinamide formyltransferase          | RFD188_04912   | RFA25f_04133  | RFA21d2_02312  | 97.9%    | 97.4%     |
| pFi_069 ( <i>attD</i> ) | putative enoyl CoA hydratase/isomerase                                         | RFD188_04913   | RFA25f_04132  | RFA21d2_02311  | 97.5%    | 99.3%     |
| pFi_070 ( <i>attE</i> ) | putative beta-lactam synthetase                                                | RFD188_04914   | RFA25f_04131  | RFA21d2_02310  | 96.1%    | 95.9%     |
| pFi_071 ( <i>attF</i> ) | putative clavaminic acid synthetase                                            | RFD188_04915   | RFA25f_04130  | RFA21d2_02309  | 97.2%    | 94.3%     |
| pFi_072 ( <i>attG</i> ) | putative acetyl-CoA synthetase                                                 | RFD188_04916   | RFA25f_04129  | RFA21d2_02308  | 95.9%    | 96.1%     |
| pFi_073 ( <i>attH</i> ) | putative bifunctional ornithine acetyl transferase/N-acetylglutamate synthase  | RFD188_04917   | RFA25f_04128  | RFA21d2_02307  | 97.9%    | 93.0%     |
| pFi_074 ( <i>fasR</i> ) | AraC type transcriptional regulator                                            | RFD188_04918   | RFA25f_04127  | RFA21d2_02306  | 97.1%    | 75.0%     |
| pFi_075                 | putative SAM-dependent methyltransferase                                       | RFD188_04919   | RFA25f_04126  |                | 98.2%    |           |
| pFi_076                 | putative SAM-dependent methyltransferase                                       | RFD188_04920   | RFA25f_04125  |                | 98.9%    |           |
| pFi_077 ( <i>fasA</i> ) | putative cytochrome P450 monooxygenase                                         | RFD188_04921   | RFA25f_04124  |                | 99.3%    |           |
| pFi_078 ( <i>fasB</i> ) | putative dual protein                                                          | RFD188_04922   | RFA25f_04123  |                | 98.4%    |           |
| pFi_079 ( <i>fasC</i> ) | putative pyrimidine-binding transketolase                                      | RFD188_04923   | RFA25f_04122  |                | 98.1%    |           |
| pFi_080 ( <i>fasD</i> ) | isopentenyl transferase (IPT)                                                  | RFD188_04924   | RFA25f_04121  |                | 95.2%    |           |
| pFi_081 ( <i>fasE</i> ) | cytokinin dehydrogenase/oxidase                                                | RFD188_04925   | RFA25f_04120  |                | 95.2%    |           |
| pFi_082 ( <i>fasF</i> ) | phosphoribohydrolase (LOG)                                                     | RFD188_04926   | RFA25f_04119  | RFA21d2_02304  | 97.5%    | 39.4%     |
| pFi_083                 | putative dibenzothiophene desulfurization enzyme A                             | RFD188_04927   | RFA25f_04118  | RFA21d2_03196  | 99.1%    | 50.3%     |
| pFi_084                 | putative acyltransferase PapA5                                                 | RFD188_04928   | RFA25f_04117  |                | 91.5%    |           |
| pFi_094                 | putative peptidase family M23 protein                                          | RFD188_04938   | RFA25f_04558  | RFA21d2_02435  | 44.0%    | 52.8%     |
| pFi_095                 | hypothetical protein                                                           | RFD188_04939   |               | RFA21d2_02434  |          | 39.7%     |
| pFi_098                 | putative DNA translocase of the FtsK/SpoIIIE family                            | RFD188_04941   |               | RFA21d2_02442  |          | 31.4%     |
| pFi_108                 | putative (poly)peptide deformylase                                             | RFD188_04951   | RFA25f_04045  |                | 82.5%    |           |
| pFi_126                 | hypothetical protein                                                           | RFD188_04970   |               | RFA21d2_02404  |          | 89.6%     |
| pFi_129                 | hypothetical protein                                                           | RFD188_04973   |               | RFA21d2_02400  |          | 93.8%     |

|         |                                                |              |              |               |       |       |
|---------|------------------------------------------------|--------------|--------------|---------------|-------|-------|
| pFi_131 | hypothetical protein                           | RFD188_04974 |              | RFA21d2_02398 |       | 90.5% |
| pFi_144 | gentisate 1,2-dioxygenase                      | RFD188_04986 |              | RFA21d2_02231 |       | 31.0% |
| pFi_151 | putative MerR family transcriptional regulator | RFD188_04993 |              | RFA21d2_02407 |       | 60.0% |
| pFi_170 | hypothetical protein                           | RFD188_05010 |              | RFA21d2_02420 |       | 61.6% |
| pFi_183 | hypothetical protein                           | RFD188_05023 | RFA25f_03728 |               | 27.3% |       |
| pFi_184 | hypothetical protein                           | RFD188_05024 |              | RFA21d2_02460 |       | 31.6% |

\*Locus identifiers from previously published pFID188 linear plasmid sequence; <sup>§</sup>Based on this study.
