# Supplementary material for: Analysis of Genome Sequences from Plant Pathogenic Rhodococcus Reveals Genetic Novelties in Virulence Loci
Source: PubMed Central journal article supplement (PMC4092121; doi:10.1371/journal.pone.0101996), 2014-07-10
Supplement: pone.0101996.s008.pdf [file pone.0101996.s008.pdf]

**Supplemental Table S3: Homologs of enzymes of the methylerythritol phosphate pathway are present in all 20 isolates of *Rhodococcus***

|                                       | DXPS*                        | DXPR*                          | CMS*                           | CMK*                            | MCS*                           | HDS*                         | IDS*                         | IDI1*                          |
|---------------------------------------|------------------------------|--------------------------------|--------------------------------|---------------------------------|--------------------------------|------------------------------|------------------------------|--------------------------------|
| <i>Nocardia farcinia</i> <sup>^</sup> | YP_119953                    | YP_120333                      | YP_116642                      | YP_121117                       | YP_116643                      | YP_120331                    | YP_121011                    | YP_118189                      |
| GIC26                                 | RFGIC26_02338<br>72.35; 0.0  | RFGIC26_02145<br>74.13; 0.0    | RFGIC26_00763<br>66.35; 2e-82  | RFGIC26_03805<br>75.90; 5e-161  | RFGIC26_00764<br>81.82; 1e-83  | RFGIC26_02147<br>87.34; 0.0  | RFGIC26_01206<br>84.48; 0.0  | RFGIC26_02627<br>43.40; 2e-29  |
| GIC36                                 | RFGIC36_02362<br>72.35; 0.0  | RFGIC36_02108<br>73.87; 0.0    | RFGIC36_00754<br>65.71; 4e-81  | RFGIC36_03898<br>76.22; 1e-161  | RFGIC36_00755<br>82.47; 1e-83  | RFGIC36_02110<br>87.34; 0.0  | RFGIC36_01284<br>84.18; 0.0  | RFGIC36_02651<br>43.40; 2e-29  |
| 05-561-1                              | RF05561_02716<br>72.31; 0.0  | RF05561_02520<br>74.13; 0.0    | RF05561_00754<br>65.40; 2e-80  | RF05561_04429<br>75.90; 7e-161  | RF05561_00755<br>82.47; 1e-83  | RF05561_02522<br>87.34; 0.0  | RF05561_01245<br>84.18; 0.0  | RF05561_02957<br>43.40; 2e-29  |
| LMG3605                               | RF3605_02508<br>72.51; 0.0   | RF3605_02175<br>73.87; 0.0     | RF3605_04159<br>65.88; 1e-81   | RF3605_03773<br>76.22; 2e-161   | RF3605_04158<br>82.47; 1e-83   | RF3605_02177<br>87.34; 0.0   | RF3605_01317<br>84.18; 0.0   | RF3605_02797<br>43.40; 1e-29   |
| <i>D188</i>                           | RFD188_02269<br>72.51; 0.0   | RFD188_02074<br>73.87; 0.0     | RFD188_00725<br>65.88; 1e-81   | RFD188_03538<br>76.22; 3e-161   | RFD188_00726<br>82.47; 1e-83   | RFD188_02076<br>87.34; 0.0   | RFD188_01214<br>84.18; 0.0   | RFD188_02558<br>43.40; 1e-29   |
| LMG3602                               | RF3602_03412<br>72.51; 0.0   | RF3602_03060<br>74.40; 0.0     | RF3602_00204<br>65.71; 2e-81   | RF3602_04805<br>76.22; 1e-161   | RF3602_00203<br>82.47; 1e-83   | RF3602_03062<br>87.34; 0.0   | RF3602_02266<br>84.18; 0.0   | RF3602_03698<br>42.77; 3e-29   |
| LMG3616                               | RF3616_02691<br>72.51; 0.0   | RF3616_02316<br>73.87; 0.0     | RF3616_00833<br>66.35; 2e-82   | RF3616_03691<br>76.22; 2e-161   | RF3616_00834<br>82.47; 1e-83   | RF3616_02318<br>87.86; 0.0   | RF3616_01325<br>84.18; 0.0   | RF3616_02978<br>42.77; 3e-29   |
| A3b                                   | RFA3b_02032<br>72.35; 0.0    | RFA3b_01766<br>74.13; 0.0      | RFA3b_00611<br>66.35; 3e-82    | RFA3b_03832<br>76.22; 3e-161    | RFA3b_00612<br>82.47; 1e-83    | RFA3b_01768<br>87.08; 0.0    | RFA3b_01082<br>83.88; 0.0    | RFA3b_02350<br>42.77; 3e-29    |
| <b>LMG3623</b>                        | RF3623_02067<br>72.51; 0.0   | RF3623_01470<br>73.87; 0.0     | RF3623_00294<br>65.88; 2e-81   | RF3623_03568<br>76.22; 2e-161   | RF3623_00295<br>82.47; 1e-83   | RF3623_01472<br>87.34; 0.0   | RF3623_04267<br>84.18; 0.0   | RF3623_02356<br>42.77; 3e-29   |
| A78                                   | RFA78_02580<br>72.35; 0.0    | RFA78_02388<br>73.87; 0.0      | RFA78_00866<br>65.71; 7e-82    | RFA78_03918<br>76.22; 4e-161    | RFA78_00867<br>81.82; 4e-83    | RFA78_02390<br>87.34; 0.0    | RFA78_01369<br>84.18; 0.0    | RFA78_02867<br>43.40; 2e-29    |
| A21d2                                 | RFA21d2_01886<br>72.86; 0.0  | RFA21d2_01613<br>74.13; 0.0    | RFA21d2_00584<br>65.88; 2e-81  | RFA21d2_04036<br>75.42; 5e-158  | RFA21d2_00585<br>80.79; 1e-82  | RFA21d2_01615<br>87.60; 0.0  | RFA21d2_01116<br>84.48; 0.0  | RFA21d2_02183<br>40.61; 6e-26  |
| 04-516                                | RF04516_02331<br>72.70; 0.0  | RF04516_02140<br>73.87; 4e-180 | RF04516_05280<br>66.35; 3e-82  | RF04516_01001<br>75.42; 5e-158  | RF04516_05281<br>80.79; 1e-82  | RF04516_02142<br>87.60; 0.0  | RF04516_00530<br>84.48; 0.0  | RF04516_02628<br>40.61; 6e-26  |
| A25f                                  | RFA25f_02996<br>73.02; 0.0   | RFA25f_02802<br>74.13; 0.0     | RFA25f_00482<br>65.88; 3e-82   | RFA25f_02465<br>75.08; 2e-157   | RFA25f_00483<br>80.79; 1e-82   | RFA25f_02804<br>87.60; 0.0   | RFA25f_01062<br>84.48; 0.0   | RFA25f_03300<br>40.61; 1e-25   |
| LMG3625                               | RF3625_04912<br>73.02; 0.0   | RF3625_03926<br>73.87; 3e-180  | RF3625_02426<br>66.35; 5e-83   | RF3625_04242<br>74.91; 2e-151   | RF3625_02427<br>80.79; 1e-82   | RF3625_03928<br>87.34; 0.0   | RF3625_02964<br>83.88; 0.0   | RF3625_05210<br>40.00; 5e-25   |
| 05-339-1                              | RF05339_02297<br>72.83; 0.0  | RF05339_02107<br>74.06; 0.0    | RF05339_00278<br>65.07; 1e-77  | RF05339_04009<br>75.42; 3e-157  | RF05339_00277<br>79.87; 4e-83  | RF05339_02109<br>87.60; 0.0  | RF05339_01291<br>84.18; 0.0  | RF05339_02591<br>41.21; 3e-26  |
| A76                                   | RFA76_02494<br>72.83; 0.0    | RFA76_02302<br>74.40; 0.0      | RFA76_05363<br>65.14; 2e-85    | RFA76_03930<br>75.42; 3e-157    | RFA76_05364<br>79.87; 3e-83    | RFA76_02304<br>87.60; 0.0    | RFA76_01654<br>84.18; 0.0    | RFA76_02795<br>40.34; 4e-27    |
| <i>A44a</i>                           | RFA44a_02292<br>74.13; 0.0   | RFA44a_02099<br>74.40; 0.0     | RFA44a_00645<br>65.47; 4e-88   | RFA44a_05247<br>76.55; 5e-162   | RFA44a_00646<br>81.46; 5e-82   | RFA44a_02101<br>89.38; 0.0   | RFA44a_01139<br>83.28; 0.0   | RFA44a_01395<br>41.21; 4e-26   |
| 02-815                                | RF02815_02526<br>74.13; 0.0  | RF02815_02333<br>74.40; 0.0    | RF02815_01093<br>64.57; 4e-86  | RF02815_04653<br>76.55; 6e-162  | RF02815_01094<br>81.46; 5e-82  | RF02815_02335<br>89.38; 0.0  | RF02815_01297<br>83.28; 0.0  | RF02815_02069<br>40.61; 2e-25  |
| 02-816c                               | RF02816c_02438<br>74.13; 0.0 | RF02816c_02246<br>74.40; 0.0   | RF02816c_00772<br>65.02; 6e-87 | RF02816c_04485<br>76.55; 6e-162 | RF02816c_00773<br>81.46; 5e-82 | RF02816c_02248<br>89.38; 0.0 | RF02816c_01507<br>83.28; 0.0 | RF02816c_01700<br>40.61; 2e-25 |
| A73a                                  | RFA73a_02592<br>74.13; 0.0   | RFA73a_02400<br>74.40; 0.0     | RFA73a_00558<br>64.57; 4e-86   | RFA73a_01123<br>76.55; 5e-162   | RFA73a_00559<br>81.46; 5e-82   | RFA73a_02402<br>89.38; 0.0   | RFA73a_01858<br>83.28; 0.0   | RFA73a_01567<br>40.61; 2e-25   |

\*Locus; % identity; BLAST e-value. Column abbreviations: Deoxyxylulose 5-phosphate synthase (DXPS); DXP reductoisomerase (DXPR); isopentenyl diphosphate isomerase (IDI1); 4-diphosphocytidyl-2C-methyl-D-erythriol synthase (CMS); 4-(cytidine 5'-diphospho)-2-C-methyl-D-

erythritol kinase (CMK); 2-C-methyl-D-erythritol 2,4-cyclodiphosphate synthase (MCS); hydroxy-2-methyl-2-(E)-butenyl 4-diphosphate synthase (HDS); hydroxy-2-methyl-2-(E)-butenyl 4-diphosphate reductase (HDR); No homologs of the MEP pathway were identified: 3-hydroxy-3-methylglutaryl-CoA synthase (HMGS; *N. farcinia*; YP\_118423); 3-hydroxy-3-methylglutaryl-CoA reductase (HMGR; class I; *N. farcinia*; YP\_118422); Mevalonate Kinase (MVK; *N. farcinia*; YP\_118418); Phosphomevalonate kinase (PMK; *N. farcinia*; YP\_118420); Mevalonate-5-decarboxylase (MDC; *N. farcinia*; YP\_118419). YP\_118418 identified homologs in isolates of sub-clades i and ii but e-values ranged from  $6e-10$  ~  $3e-10$  and CDSs are annotated as galactokinase. ^Genbank ID number of sequence used for BLAST searches.
