# Supplementary material for: Analysis of Genome Sequences from Plant Pathogenic Rhodococcus Reveals Genetic Novelties in Virulence Loci
Source: PubMed Central journal article supplement (PMC4092121; doi:10.1371/journal.pone.0101996), 2014-07-10
Supplement: pone.0101996.s009.pdf [file pone.0101996.s009.pdf]

**Supplemental Table S4: Cytokinin types that were profiled from D188**

| Cytokinin Type                    | Abbreviation | Detected (Y/N) |
|-----------------------------------|--------------|----------------|
| Isopentenyladenine                | iP           | Y              |
| 2-methylthio isopentenyladenine   | MS-iP        | N              |
| isopentenyladenine glucoside      | iP-G         | N              |
| isopentenyladenosine              | iPA          | Y              |
| 2-methylthio isopentenyladenosine | MS-iPA       | N              |
| isopentenyladenine ribotide       | iPAMP        | Y              |
| cis-zeatin                        | cZ           | Y              |
| cis-zeatin riboside               | cZR          | Y              |
| 2-methylthio-cis-zeatin           | 2MeScZ       | Y              |
| 2-methylthio-cis-zeatin riboside  | 2MeScZR      | Y              |
| trans-zeatin                      | tZ           | N              |
| trans-zeatin riboside             | tZR          | N              |
| zeatin N-glucoside                | ZNG          | N              |
| trans-zeatin ribotide             | tZRMP        | Y              |
| Dihydrozeatin                     | DHZ          | N              |
| dihydrozeatin riboside            | DHZR         | N              |
| dihydro zeatin N-glucoside        | DHZNG        | N              |
| dihydrozeatin riboside phosphate  | DHZR-MP      | N              |
| ortho-topolin                     | o-Top        | N              |
| meta-topolin                      | m-Top        | N              |
| para-topolin                      | p-Top        | N              |
| ortho-topolin riboside            | o-TopR       | N              |
| meta-topolin riboside             | m-TopR       | N              |
| para-topolin riboside             | p-TopR       | N              |
| ortho-topolin glucoside           | o-TopG       | N              |
| meta-topolin glucoside            | m-TopG       | N              |
| para-topolin glucoside            | p-TopG       | N              |
| 6-benzylaminopurine               | BAP          | N              |
| 6-benzylaminopurine riboside      | BAPR         | N              |
| 3-glucoside                       | BAP3G        | N              |
| 7-glucoside                       | BAP7G        | N              |
| 9-glucoside                       | BAP9G        | N              |
