# Supplementary material for: Analysis of Genome Sequences from Plant Pathogenic Rhodococcus Reveals Genetic Novelties in Virulence Loci
Source: PubMed Central journal article supplement (PMC4092121; doi:10.1371/journal.pone.0101996), 2014-07-10
Supplement: pone.0101996.s010.pdf [file pone.0101996.s010.pdf]

**Supplemental Table S5: Oligonucleotide sequences**

| Target Sequence                           | Purpose                                                                           | Oligonucleotide sequence (5'-3')           |
|-------------------------------------------|-----------------------------------------------------------------------------------|--------------------------------------------|
| 16s rDNA                                  | <i>Rhodococcus</i> -specific positive control                                     | TACGGAGAGTTTGATCCTGGC (top)                |
|                                           |                                                                                   | AGAAAGGAGGTGATCCAGCCG (bottom)             |
|                                           | qRT-PCR housekeeping primers                                                      | CCAAGGCGACGACGGGTAGC (top)                 |
|                                           |                                                                                   | TCGCTGCATCAGGCTTCCGC (bottom)              |
| pFi_013                                   | Linear plasmid R1 region                                                          | ATGGCAATATCAAATTCCTC (top)                 |
|                                           |                                                                                   | TCATGCGGGTGCTACCTCTTC (bottom)             |
| pFi_070 and RFA21d2_02310 ( <i>attE</i> ) | qRT-PCR                                                                           | ACTCCTCGCCTCCTACTTGTGG (top)               |
|                                           |                                                                                   | GCGGAGGTAGTACTTTTCGATGC (bottom)           |
| pFi_080 ( <i>fasD</i> )                   | <i>fasD</i> (full length)                                                         | CAAAAAGCAGGCTCCATGAAGGAATCAACCATGGCA (top) |
|                                           |                                                                                   | GAAAGCTGGGTGCTGGCGGTCACACCTGGGGC (bottom)  |
|                                           | qRT-PCR                                                                           | TGACCGGCTGATAAAAGTACTGACC (top)            |
|                                           |                                                                                   | ACCAGTCGAGTACACAGTCCAGACC (bottom)         |
| RFA21d2_02304 ( <i>fasD-F</i> fusion)     | A21d2_02304 (full length)                                                         | CAAAAAGCAGGCTCCATGTCGCCTTTGTACTCG (top)    |
|                                           |                                                                                   | GAAAGCTGGGTGCTCGTCATTGCCATCCTG (bottom)    |
|                                           | RT-PCR                                                                            | TGATAGTCACCGGTGATC (top)                   |
|                                           |                                                                                   | TTGCCTAGTTCTACTGCC (bottom)                |
| RFA21d2_02303                             | A21d2_02303 (full length)                                                         | CAAAAAGCAGGCTCCATGACGACTGA/AGGTTCA (top)   |
|                                           |                                                                                   | GAAAGCTGGGTGCTATCTGGCTCTATCGTC (bottom)    |
|                                           | RT-PCR                                                                            | AGCTTTGAGGTAATTCCTACT (bottom)             |
| RFA21d2_02305                             | A21d2_02305 (full length)                                                         | CAAAAAGCAGGCTCCATGAGGGACGGGCTGCAA (top)    |
|                                           |                                                                                   | GAAAGCTGGGTGCTTCTCGACCTTGTTGGA (bottom)    |
|                                           | RT-PCR                                                                            | AGATGCCACTTGTGCCTTCCG (top)                |
| Contig 21 (A21d2)                         | TAIL-PCR (two nested sets for left (GSL1-3) and right side (GSR1-3) of contig 21) | CGCTGACGGCCCAGAGCACG (GSL1)                |
|                                           |                                                                                   | CCTCGATCGTGCAGAAGCTG (GSL2)                |
|                                           |                                                                                   | CAAGTGGAGATTGTTCTTCG (GSL3)                |
|                                           |                                                                                   | GAACTCGCAGCGTCGATATG (GSR1)                |
|                                           |                                                                                   | GATGGACAAGGACACACGGG (GSR2)                |
|                                           |                                                                                   | CGACGTTGATCTGGGTACCG (GSR3)                |
