# Supplementary material for: Analysis of Genome Sequences from Plant Pathogenic Rhodococcus Reveals Genetic Novelties in Virulence Loci
Source: PubMed Central journal article supplement (PMC4092121; doi:10.1371/journal.pone.0101996), 2014-07-10
Supplement: pone.0101996.s011.pdf [file pone.0101996.s011.pdf]

**Supplemental Table S6: Parent ions and diagnostic transitions used in multiple reactant monitoring (MRM) for the analysis of cytokinins by ACQUITY TQP UPLC-MS/MS**

| <b>Compound</b>                                     | <b>Parent ion</b> | <b>Diagnostic transition MRM</b> |
|-----------------------------------------------------|-------------------|----------------------------------|
| iP                                                  | 204               | 204 → 136                        |
| [ <sup>2</sup> H <sub>6</sub> ]iP                   | 210               | 210 → 137                        |
| iPA                                                 | 336               | 336 → 204                        |
| [ <sup>2</sup> H <sub>6</sub> ][ <sup>9</sup> R]iP  | 342               | 342 → 210                        |
| Z                                                   | 220               | 220 → 136                        |
| DHZ                                                 | 222               | 222 → 136                        |
| [ <sup>2</sup> H <sub>5</sub> ]DHZ                  | 225               | 225 → 136                        |
| ZR                                                  | 352               | 352 → 220                        |
| [ <sup>2</sup> H <sub>5</sub> ][ <sup>9</sup> R]DHZ | 354               | 354 → 222                        |
| MS-Z                                                | 266               | 266 → 182                        |
| [ <sup>2</sup> H <sub>5</sub> ]MSZ                  | 271               | 271 → 182/183                    |
| MS-ZR                                               | 398               | 398 → 266                        |
| [ <sup>2</sup> H <sub>5</sub> ]MSZR                 | 403               | 403 → 271                        |
